# Supplementary material for: Influenza A Virus-Driven Airway Inflammation may be Dissociated From Limb Muscle Atrophy in Cigarette Smoke-Exposed Mice
Source: Frontiers journal article supplement (doi:10.3389/fphar.2022.859146), 2022-03-18
Supplement: Data_Sheet_1.PDF [file Data_Sheet_1.PDF]

# **Influenza A virus-driven airway inflammation may be dissociated from limb muscle atrophy in cigarette smoke-exposed mice**

**Kevin Mou<sup>1</sup>, Stanley MH. Chan<sup>1</sup>, Kurt Brassington<sup>1</sup>, Aleksandar Dobric<sup>1</sup>, Simone N. De Luca<sup>1</sup>, Huei Jiunn Seow<sup>1</sup>, Stavros Selemidis<sup>1</sup>, Steven Bozinovski<sup>1</sup>, Ross Vlahos<sup>1\*</sup>**

<sup>1</sup>School of Health and Biomedical Sciences, RMIT University, BUNDOORA, VIC 3083, Australia.

**\* Correspondence:**

Professor Ross Vlahos, PhD

School of Health and Biomedical Sciences

RMIT University, PO Box 71, Bundoora, VIC 3083 Australia

Tel: +61 3 9925 7362

Email: ross.vlahos@rmit.edu.au

**Keywords:** viral exacerbation, COPD, muscle weakness, fiber type transformation, lung-to-muscle axis, myogenic disruption, conditioned medium.

## ***Supplementary Material***

**1 SUPPLEMENTARY FIGURES****(A)**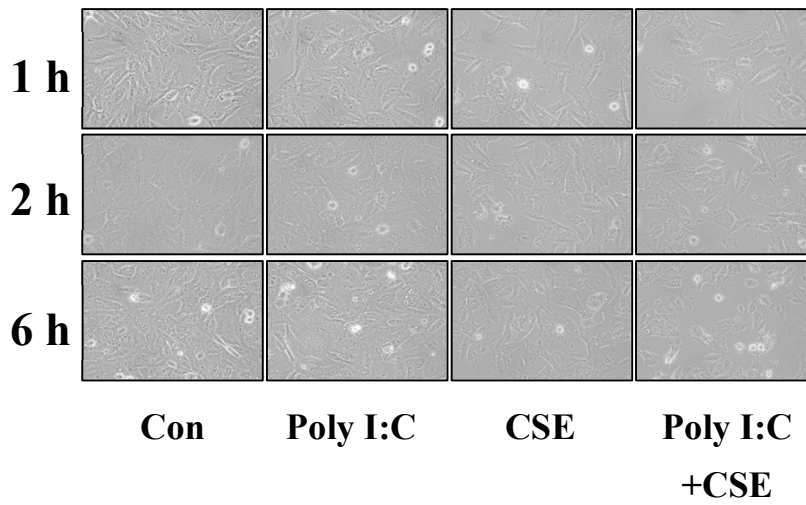**(B)**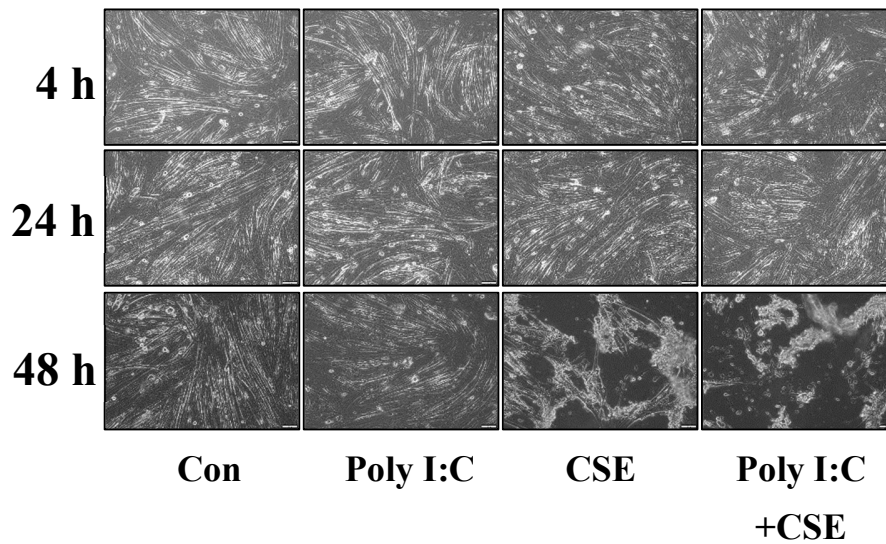

**Supplementary Figure 1.** Representative images of cell morphology/viability following (A) direct exposure of Poly I:C (TLR3 agonist), cigarette smoke extract (CSE) or their combination in BEAS-2B cells, or (B) C2C12 myotubes exposed to conditioned media derived from the respective conditions in BEAS-2B.
